# Supplementary material for: Optimized Purification of a Heterodimeric ABC Transporter in a Highly Stable Form Amenable to 2-D Crystallization
Source: PubMed Central journal article supplement (PMC3094339; doi:10.1371/journal.pone.0019677), 2011-05-13
Supplement: pone.0019677.s003.pdf [file pone.0019677.s003.pdf]

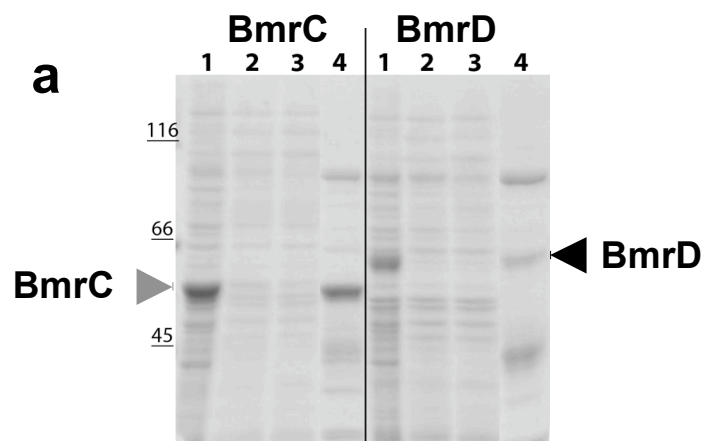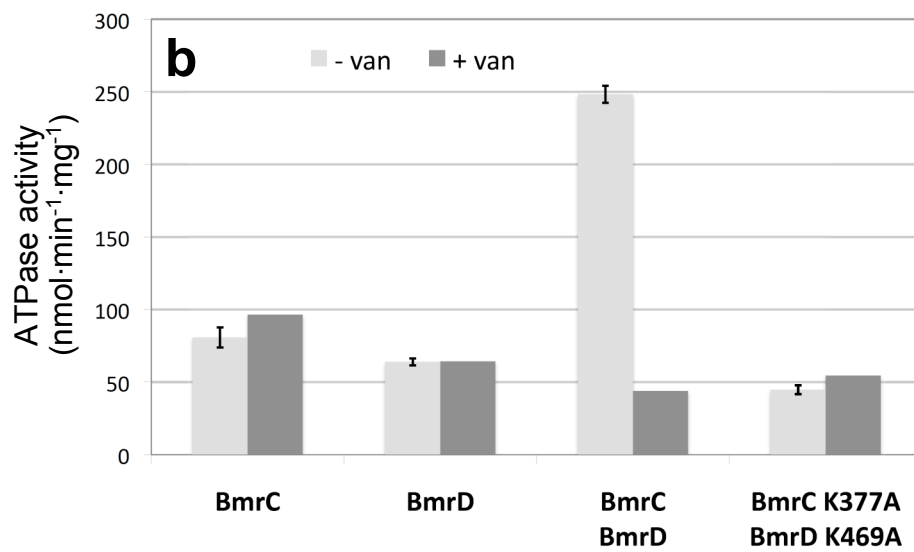

Figure S3
