# Supplementary material for: Optimized Purification of a Heterodimeric ABC Transporter in a Highly Stable Form Amenable to 2-D Crystallization
Source: PubMed Central journal article supplement (PMC3094339; doi:10.1371/journal.pone.0019677), 2011-05-13
Supplement: pone.0019677.s006.pdf [file pone.0019677.s006.pdf]

| #        | PHASE RESIDUALS |      | IN RESOLUTION RANGES   |      |      |      |       |                       |       |       |      |       | all IQs | IQ-wght |
|----------|-----------------|------|------------------------|------|------|------|-------|-----------------------|-------|-------|------|-------|---------|---------|
|          | DMIN            | DMAX | IQ=1                   | 2    | 3    | 4    | 5     | 6                     | 7     | 8     |      |       |         |         |
| 1        | 1000.0          | 73.7 | 7.1                    | 14.6 | 0.0  | 0.0  | 0.0   | 112.9                 | 156.2 | 96.8  | 34.2 | 14.3  |         |         |
| 1        | 16              | 4    | 0                      | 0    | 0    | 1    | 2     | 3                     | 26    | 26    |      |       |         |         |
| 2        | 73.5            | 52.1 | 4.5                    | 21.7 | 70.2 | 93.0 | 160.4 | 81.5                  | 0.0   | 104.0 | 35.0 | 22.4  |         |         |
| 2        | 16              | 11   | 3                      | 3    | 1    | 2    | 0     | 2                     | 38    | 38    |      |       |         |         |
| 3        | 52.1            | 42.6 | 10.5                   | 45.1 | 47.7 | 21.8 | 12.4  | 21.6                  | 0.0   | 0.0   | 29.3 | 29.9  |         |         |
| 3        | 4               | 3    | 5                      | 2    | 2    | 2    | 0     | 0                     | 18    | 18    |      |       |         |         |
| 4        | 42.5            | 36.9 | 6.0                    | 4.4  | 29.7 | 18.8 | 15.6  | 37.7                  | 9.9   | 78.9  | 14.7 | 8.4   |         |         |
| 4        | 22              | 10   | 5                      | 1    | 2    | 1    | 1     | 3                     | 45    | 45    |      |       |         |         |
| 5        | 36.8            | 33.0 | 3.9                    | 11.7 | 10.4 | 13.4 | 0.0   | 42.5                  | 0.0   | 0.9   | 11.6 | 11.0  |         |         |
| 5        | 3               | 13   | 3                      | 3    | 0    | 1    | 0     | 1                     | 24    | 24    |      |       |         |         |
| 6        | 33.0            | 30.1 | 0.0                    | 16.4 | 22.2 | 20.8 | 61.2  | 121.8                 | 0.0   | 51.1  | 33.6 | 26.2  |         |         |
| 6        | 0               | 8    | 6                      | 3    | 5    | 1    | 0     | 1                     | 24    | 24    |      |       |         |         |
| 7        | 30.1            | 27.9 | 8.8                    | 8.3  | 21.2 | 22.6 | 43.4  | 111.2                 | 0.0   | 62.2  | 31.5 | 20.6  |         |         |
| 7        | 1               | 14   | 4                      | 7    | 6    | 4    | 0     | 2                     | 38    | 38    |      |       |         |         |
| 8        | 27.9            | 26.1 | 6.2                    | 11.6 | 0.0  | 66.5 | 0.0   | 0.0                   | 20.7  | 0.0   | 23.7 | 18.0  |         |         |
| 8        | 3               | 6    | 0                      | 3    | 0    | 0    | 1     | 0                     | 13    | 13    |      |       |         |         |
| 9        | 26.1            | 24.6 | 0.0                    | 0.0  | 0.0  | 25.5 | 18.2  | 23.1                  | 20.2  | 54.3  | 38.1 | 22.1  |         |         |
| 9        | 0               | 0    | 0                      | 1    | 1    | 3    | 2     | 7                     | 14    | 14    |      |       |         |         |
| 10       | 24.6            | 23.3 | 0.0                    | 10.3 | 15.4 | 32.3 | 20.5  | 24.0                  | 39.7  | 19.1  | 23.3 | 20.6  |         |         |
| 10       | 0               | 2    | 6                      | 3    | 4    | 2    | 4     | 2                     | 23    | 23    |      |       |         |         |
| 11       | 23.3            | 22.2 | 0.0                    | 1.8  | 22.0 | 18.2 | 26.3  | 33.6                  | 41.0  | 36.1  | 26.7 | 22.2  |         |         |
| 11       | 0               | 1    | 4                      | 3    | 5    | 2    | 2     | 3                     | 20    | 20    |      |       |         |         |
| 12       | 22.2            | 21.3 | 0.0                    | 15.9 | 0.0  | 22.4 | 0.0   | 14.4                  | 0.0   | 30.4  | 20.0 | 18.0  |         |         |
| 12       | 0               | 1    | 0                      | 2    | 0    | 2    | 0     | 1                     | 6     | 6     |      |       |         |         |
| 13       | 21.3            | 20.4 | 0.0                    | 0.0  | 0.0  | 17.5 | 0.0   | 21.4                  | 0.0   | 52.3  | 35.9 | 19.1  |         |         |
| 13       | 0               | 0    | 0                      | 1    | 0    | 1    | 0     | 2                     | 4     | 4     |      |       |         |         |
| 14       | 20.4            | 19.7 | 0.0                    | 0.0  | 13.3 | 35.9 | 41.0  | 26.3                  | 0.0   | 52.0  | 41.5 | 29.0  |         |         |
| 14       | 0               | 0    | 2                      | 1    | 4    | 2    | 0     | 9                     | 18    | 18    |      |       |         |         |
| 15       | 19.7            | 19.0 | 0.0                    | 0.0  | 0.0  | 0.0  | 0.0   | 129.2                 | 0.0   | 63.7  | 76.8 | 129.2 |         |         |
| 15       | 0               | 0    | 0                      | 0    | 0    | 1    | 0     | 4                     | 5     | 5     |      |       |         |         |
|          |                 |      | 6.1                    | 13.5 | 27.7 | 32.6 | 39.3  | 55.3                  | 52.0  | 57.4  |      |       |         |         |
|          |                 |      | 65                     | 73   | 38   | 33   | 30    | 25                    | 12    | 40    |      |       |         |         |
| Overall: |                 |      | Phaseresidual = 28.462 |      |      |      |       | Number of spots = 316 |       |       |      |       |         |         |

Table S1
