# Supplementary material for: Optimized Purification of a Heterodimeric ABC Transporter in a Highly Stable Form Amenable to 2-D Crystallization
Source: PubMed Central journal article supplement (PMC3094339; doi:10.1371/journal.pone.0019677), 2011-05-13
Supplement: pone.0019677.s007.pdf [file pone.0019677.s007.pdf]

| Plane group                     | Phase. Residual<br>(degree) <sup>a</sup> | Number.<br>of comparison | Target residual<br>(degree) <sup>b</sup> |
|---------------------------------|------------------------------------------|--------------------------|------------------------------------------|
| p1                              | 24.8 <sup>c</sup>                        | 178                      |                                          |
| p2                              | 41.0!                                    | 89                       | 36.2                                     |
| p12_b                           | 79.5                                     | 64                       | 25.9                                     |
| p12_a                           | 31.6`                                    | 67                       | 26.3                                     |
| p12 <sub>1</sub> _b             | 19.0*                                    | 64                       | 25.9                                     |
| p12 <sub>1</sub> _a             | 77.2                                     | 67                       | 26.3                                     |
| c12_b                           | 79.5                                     | 64                       | 25.9                                     |
| c12_a                           | 31.6`                                    | 67                       | 26.3                                     |
| p222                            | 65.2                                     | 220                      | 29.4                                     |
| p222 <sub>1</sub> b             | 64.9                                     | 220                      | 29.4                                     |
| p222 <sub>1</sub> a             | 32.1!                                    | 220                      | 29.4                                     |
| p22 <sub>1</sub> 2 <sub>1</sub> | 62.5                                     | 220                      | 29.4                                     |
| c222                            | 65.2                                     | 220                      | 29.4                                     |
| p4                              | 72.3                                     | 185                      | 30.3                                     |
| p422                            | 68.1                                     | 402                      | 27.3                                     |
| p42 <sub>1</sub> 2              | 65.6                                     | 402                      | 27.3                                     |
| p3                              | 65.7                                     | 84                       | 24.8                                     |
| p3 <sub>1</sub> 2               | 69.9                                     | 213                      | 25.3                                     |
| p32 <sub>1</sub>                | 68.7                                     | 224                      | 25.8                                     |
| p6                              | 71.2                                     | 257                      | 28.8                                     |
| p622                            | 72.7                                     | 526                      | 26.7                                     |

Table S2
